# Supplementary material for: Eco-friendly synthesis of new olanzapine derivatives and evaluation of their anticancer potential
Source: Royal Society of Chemistry journal article supplement (doi:10.1039/d3ra03926a), 2023-01-01
Supplement: d3ra03926a1.pdf [file d3ra03926a1.pdf]

SUPPORTING INFORMATION

# Eco-friendly synthesis of new olanzapine derivatives and evaluation of their anticancer potential

Anna K. Drabczyk<sup>1</sup>, Damian Kułaga<sup>1</sup>, Przemysław Zaręba<sup>2</sup>, Wiktoria Tylińska<sup>1</sup>, Wojciech Bachowski<sup>1</sup>, Aneta Archala<sup>3</sup>, Artur Wnorowski<sup>3</sup>, Andromachi Tzani<sup>4</sup>, Anastasia Detsi<sup>4</sup>, and Jolanta Jaśkowska<sup>1,4\*</sup>

<sup>1</sup> Faculty of Chemical Engineering and Technology, Department of Chemical Technology and Environmental Analytics, Cracow University of Technology, 24 Warszawska Street, 31-155 Cracow, Poland

<sup>2</sup> Faculty of Chemical Engineering and Technology, Department of Organic Chemistry and Technology, Cracow University of Technology, 24 Warszawska Street, 31-155 Cracow, Poland

<sup>3</sup> Department of Biopharmacy, Medical University of Lublin, 4a Chodzki Street, 20-059 Lublin, Poland

<sup>4</sup> Laboratory of Organic Chemistry, Department of Chemical Sciences, School of Chemical Engineering, National Technical University of Athens, 15780 Zografou, Athens, Greece

\* jolanta.jaskowska@pk.edu.pl;

## Olanzapine (2-methyl-4-(4-methylpiperazin-1-yl)-10H-thieno[2,3-b][1,5]benzodiazepine)

yellow solid, HPLC-MS analysis t: 3.24 min, calc. for C<sub>17</sub>H<sub>20</sub>N<sub>4</sub>S m/z = 312.4, found m/z = 313.2 [M+H]<sup>+</sup>; R<sub>f</sub> 0.62 (chloroform-methanol 80:20), mp = 194 °C (lit. 194 °C [1])

FT-IR (cm<sup>-1</sup>) 3237, 3178, 3100, 3050, 2942, 2922, 2839, 2804, 1587, 1558, 1454, 1411, 1360, 1281, 1266, 1220, 1146, 1029, 1003, 970, 780, 760 cm<sup>-1</sup>

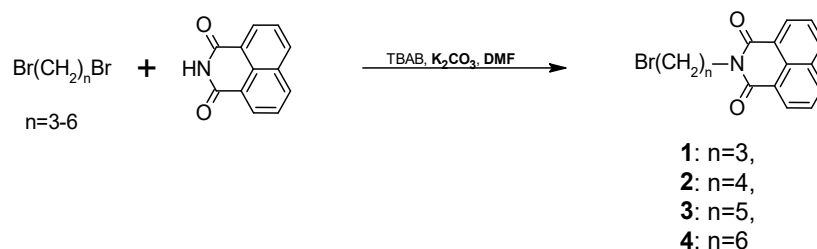

## General procedure for the synthesis of 1–4 using ultrasound

1.97 g of 1,8-naphthalimide (0.01 mol, 1 equiv), 4.14 g of potassium carbonate (0.03 mol, 3 equiv) and 0.32 g of TBAB (0.001 mol, 0.1 equiv), appropriate dibromoalkane (0.03 mol, 3 equiv) and dimethylformamide (5 mL) were placed in a round-bottomed flask, followed by in an ultrasonic bath for 1 hour (80 W, 40 KHz, 50 °C). After completion of the reaction, water was added and extraction was carried out with dichloromethane, after which the organic phase was evaporated to dryness. The crude products were crystallized using methanol.

**N-(3-bromopropyl)-1,8-naphthalimide (1)**

white solid, Y = 23%, HPLC-MS analysis t: 7.92 min, calc. for C<sub>15</sub>H<sub>12</sub>BrNO<sub>2</sub> m/z = 318.2, found m/z = 320.0 [M+H]<sup>+</sup>, R<sub>f</sub> = 0.90 (chloroform-methanol 90:10), mp = 137-138°C (138 – 140 °C [2]).  
FT-IR (cm<sup>-1</sup>): 3073, 2162, 1748, 1693, 1591, 1585, 687.

**N-(4-bromobutyl)-1,8-naphthalimide (2)**

white solid, Y = 63%, HPLC-MS analysis t: 8.44 min, calc. for C<sub>16</sub>H<sub>14</sub>BrNO<sub>2</sub> m/z = 332.2, found m/z = 333.20 [M+H]<sup>+</sup>, R<sub>f</sub> = 0.93 (chloroform-methanol 90:10), mp = 121-122°C (lit. 117-119 °C [3])  
FT-IR (cm<sup>-1</sup>): 3065, 1978, 1695, 1625, 1586, 687.

**N-(4-bromopentyl)-1,8-naphthalimide (3)**

white solid, Y = 63%, HPLC-MS analysis t: 9.06 min, calc. for C<sub>17</sub>H<sub>16</sub>BrNO<sub>2</sub> m/z = 346.2, found m/z = 348.0 [M+H]<sup>+</sup>, R<sub>f</sub> = 0.94 (chloroform-methanol 90:10), mp = 122-123°C (lit. 121-123 °C [2])  
FT-IR (cm<sup>-1</sup>): 3063, 2162, 1693, 1603, 1588, 687.

**N-(4-bromohexyl)-1,8-naphthalimide (4)**

white solid, Y = 45%, HPLC-MS analysis t: 9.40 min, calc. for C<sub>18</sub>H<sub>18</sub>BrNO<sub>2</sub> m/z = 360.2, found m/z = 361.2 [M+H]<sup>+</sup>, R<sub>f</sub> = 0.90 (chloroform-methanol 90:10), mp = 96-97°C (lit. 95-96 °C [4])  
FT-IR (cm<sup>-1</sup>): 3062, 2162, 1798, 1692, 1601, 1588, 687.

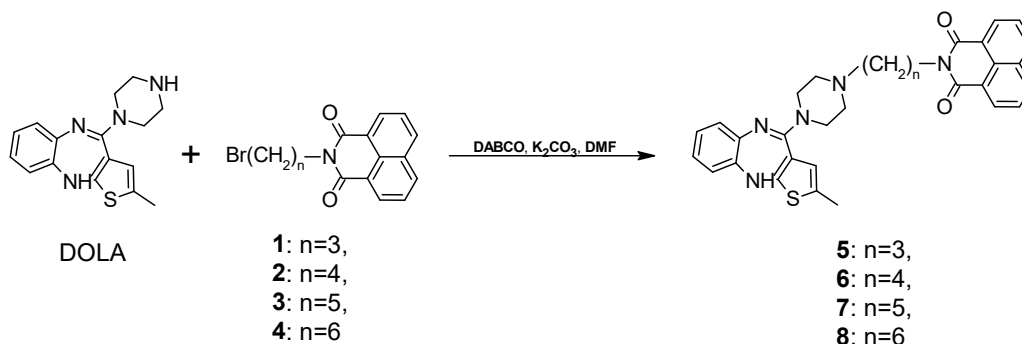**2-[3-[4-(2-methyl-5H-thieno[3,2-c][1,5]benzodiazepin-4-yl)piperazin-1-yl]propyl]-3a,6-dihydrobenzo[de]isoquinoline-1,3-dione (5)**

yellow oil; HPLC-MS analysis t: 5.23 min, calc. for C<sub>31</sub>H<sub>31</sub>N<sub>5</sub>O<sub>2</sub>S m/z = 535.7, found m/z = 536.2 [M+H]<sup>+</sup>; R<sub>f</sub> = 0.40 (chloroform-methanol 90:10); <sup>1</sup>H NMR (400 MHz, DMSO-d<sub>6</sub>) δ 8.50 (dd, J = 7.3, 0.9 Hz, 2H), 8.45 (d, J = 8.3 Hz, 2H), 7.91 – 7.84 (m, 2H), 7.59 (s, 1H), 6.87 – 6.75 (m, 3H), 6.68 (dd, J = 7.5, 1.6 Hz, 1H), 6.30 (d, J = 1.1 Hz, 1H), 4.13 (t, J = 7.2 Hz, 2H), 3.22 (bs, 4H), 2.45 (d, J = 7.1 Hz, 6H), 2.26 (s, 3H), 1.89 – 1.80 (m, 2H); <sup>13</sup>C NMR (101 MHz, CDCl<sub>3</sub>) δ 164, 159.3, 148.0, 145.2, 138.9, 137.9, 137.4, 137.5, 126.7, 129.5, 128.1, 126.6, 126.5, 125.6, 123.5, 123.6, 121.4, 117.6, 110.9, 57.4, 56.4, 50.1, 40.1, 26.6, 14.9.

**2-[4-[4-(2-methyl-5H-thieno[3,2-c][1,5]benzodiazepin-4-yl)piperazin-1-yl]butyl]-3a,6-dihydrobenzo[de]isoquinoline-1,3-dione (6)**

yellow oil; HPLC-MS analysis t: 5.43 min, calc. for C<sub>32</sub>H<sub>33</sub>N<sub>5</sub>O<sub>2</sub>S m/z = 549.7, found m/z = 550.2 [M+H]<sup>+</sup>; R<sub>f</sub> = 0.40 (chloroform-methanol 90:10); <sup>1</sup>H NMR (400 MHz, DMSO) δ 8.50 (d, J = 7.2 Hz, 2H), 8.45 (d, J = 8.2 Hz, 2H), 7.87 (t, J = 7.8 Hz, 2H), 7.60 (s, 1H), 6.87 – 6.76 (m, 3H), 6.72 – 6.65 (m, 1H), 6.33 (s, 1H), 4.08 (t, J = 7.2 Hz, 2H), 3.34 – 3.27 (s, 4H), 2.40 (d, J = 25.0 Hz, 6H), 1.68 (dt, J = 14.8, 7.5 Hz, 2H), 1.53 (dt, J = 14.4, 7.2 Hz, 2H); <sup>13</sup>C NMR (101 MHz, CDCl<sub>3</sub>) δ 164.4, 158.2, 148.6, 146.7, 139.3, 137.9, 137.8, 136.4, 127.5, 129.8, 128.1, 127.3, 126.1, 125.6, 124.5, 123.3, 120.4, 117.6, 110.9, 58.2, 50.1, 40.4, 40.1, 25.0, 25.4, 14.7.

**2-[5-[4-(2-methyl-5H-thieno[3,2-c][1,5]benzodiazepin-4-yl)piperazin-1-yl]pentyl]-3a,6-dihydrobenzo[de]isoquinoline-1,3-dione (7)**

yellow oil; HPLC-MS analysis t: 5.41 min, calc. for C<sub>33</sub>H<sub>35</sub>N<sub>5</sub>O<sub>2</sub>S m/z = 563.7, found m/z = 564.3 [M+H]<sup>+</sup>; R<sub>f</sub> = 0.30 (chloroform-methanol 90:10); <sup>1</sup>H NMR (400 MHz, DMSO) δ 8.50 (d, J = 7.3 Hz, 2H), 8.45 (d, J = 7.7 Hz, 2H), 7.90 – 7.84 (m, 2H), 7.61 (s, 1H), 6.88 – 6.76 (m, 3H), 6.69 (d, J = 7.8 Hz, 1H), 6.32 (s, J = 0.8 Hz, 1H), 4.06 (t, J = 7.3 Hz, 2H), 3.29 (bs, 4H), 2.40 (bs, 4H), 2.33 – 2.28 (m, 2H), 2.27 (s, 3H), 1.67 (dt, J = 14.8, 7.6 Hz, 2H), 1.51 (dt, J = 14.5, 7.3 Hz, 2H), 1.41 – 1.31 (m, 2H); <sup>13</sup>C NMR (101 MHz, CDCl<sub>3</sub>) δ 165, 159.4, 148.0, 147.3, 138.9, 138.1, 137.7, 131.4, 127.5, 129.5, 128.1, 126.6, 125.9, 125.6, 124.9, 124.1, 123.2, 116.5, 110.3, 58.8, 56.3, 40.3, 29.0, 28.1, 25.4, 24.4, 14.1.

**2-[6-[4-(2-methyl-5H-thieno[3,2-c][1,5]benzodiazepin-4-yl)piperazin-1-yl]hexyl]-3a,6-dihydrobenzo[de]isoquinoline-1,3-dione (8)**

HPLC-MS analysis t: 5.85 min, calc. for C<sub>34</sub>H<sub>37</sub>N<sub>5</sub>O<sub>2</sub>S m/z = 577.8, found m/z = 578.2 [M+H]<sup>+</sup>; R<sub>f</sub> = 0.32 (chloroform-methanol 90:10); <sup>1</sup>H NMR (400 MHz, DMSO) δ 8.52 – 8.44 (m, 4H), 7.90 – 7.84 (m, 2H), 7.64 (s, 1H), 6.87 – 6.78 (m, 3H), 6.70 (dd, J = 7.3, 1.4 Hz, 1H), 6.34 (s, 1H), 4.08 – 4.02 (m, 2H), 3.34 (bs, 4H), 2.50 – 2.31 (m, 6H), 2.27 (s, J = 2.8 Hz, 3H), 1.69 – 1.59 (m, 2H), 1.52 – 1.42 (m, 2H), 1.36 (s, 4H); <sup>13</sup>C NMR (101 MHz, CDCl<sub>3</sub>) δ 163.1, 158.2, 149.2, 140.3, 138.2, 138.0, 136.9, 133.4, 129.9, 128.7, 127.7, 126.6, 125.9, 125.6, 124.8, 124.1, 123.7, 115.5, 111.6, 58.3, 57.3, 40.3, 27.3, 28.1, 26.6, 25.9, 23.4, 15.0.

Literature:

1. Askin, S.; Cockcroft, J.K.; Price, L.S.; Gonçalves, A.D.; Zhao, M.; Tocher, D.A.; Williams, G.R.; Gaisford, S. & Craig, D.Q.M.; Olanzapine Form IV: Discovery of a New Polymorphic Form Enabled by Computed Crystal Energy Landscapes. *Crystal Growth and Design*, **19**, 2751 – 2757, DOI: <https://doi.org/10.1021/acs.cgd.8b01881> (2019).
2. Hossain, Sk. Ugir; Sengupta, S. & Bhattacharya, S., Synthesis and evaluation of antioxidative properties of a series of organoselenium compounds. *Bioorganic and Medicinal Chemistry*, **13**, 5750 – 5758, DOI: <https://doi.org/10.1016/j.bmc.2005.06.011> (2005).
3. Kowalski, P.; Kowalska, T.; Bojarski, A.J. & Duszynska, B. Synthesis and biological properties of 1,8-naphthalimidebutylamines. Serotonin 5-HT<sub>1A</sub> and 5-HT<sub>7</sub> binding data and pass-assisted search. *Journal of Heterocyclic Chemistry*, **44**, 889 – 893 DOI: <https://doi.org/10.1002/jhet.5570440423> (2007).
4. Zhu, L.; Yan, H.; Wang, X.-J. & Zhao, Y. Light-Controllable Cucurbit[7]uril-Based Molecular Shuttle. *Journal of Organic Chemistry*, **77**, 10168 – 10175 DOI: <https://doi.org/10.1021/jo301807y> (2012).
